# Supplementary material for: Efficacy of Lactobacillus fermentum Isolated from the Vagina of a Healthy Woman against Carbapenem-Resistant Klebsiella Infections In Vivo
Source: PubMed Central journal article supplement (PMC9705860; doi:10.4014/jmb.2103.03014), 2021-08-25
Supplement: jmb-31-10-1383-supple.pdf [file jmb-31-10-1383-supple.pdf]

A

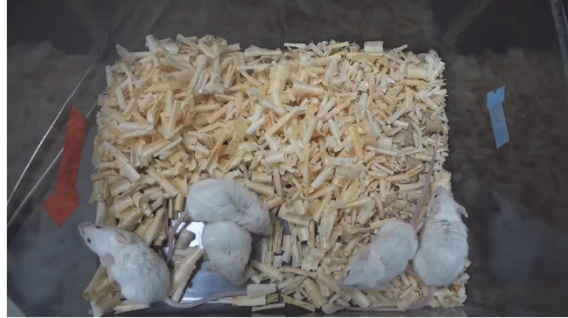

**Supplementary movie 1  
Preventive model**

B

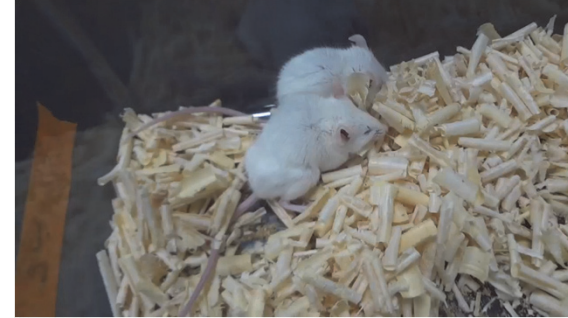

**Supplementary movie 2  
Therapeutic model**

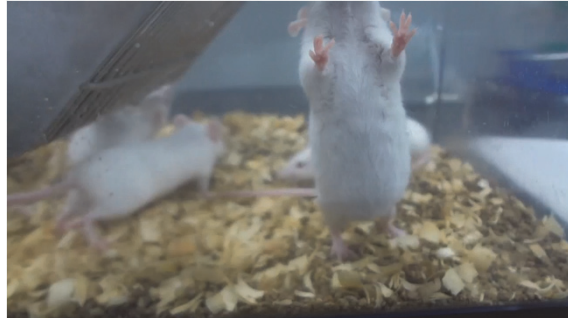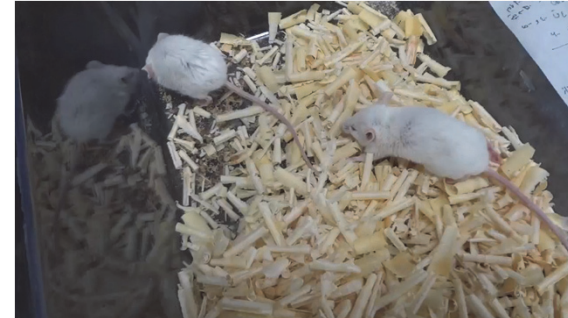

**Supplementary movie 1 and 2.**

1. Preventive model (A) *L. fermentum* treated mice (B) untreated mice
2. Therapeutic model (A) *L. fermentum* treated mice (B) untreated mice
